# Supplementary material for: The collaborative framework for the management of tuberculosis and type 2 diabetes syndemic in low- and middle-income countries: a rapid review
Source: BMC Public Health. 2024 Mar 7;24:738. doi: 10.1186/s12889-024-18256-9 (PMC10921776; doi:10.1186/s12889-024-18256-9)
Supplement: Supplementary file 2 — Supplementary Material 2. [file 12889_2024_18256_MOESM2_ESM.xlsx]

## Sheet: LMIC
Thesis Title: The collaborative framework for the management of tuberculosis and type 2 diabetes syndemic in low- and middle-income countries: A scoping review
Papers included for analysis
Nr.	Database	Date	Article Citation	Study Type	Summary of results	Comments
1	PubMed	2022-05-20	Salifu RS, Hlongwana KW. Frontline healthcare workers' experiences in implementing the TB-DM collaborative framework in Northern Ghana. BMC Health Serv Res. 2021 Aug 23;21(1):861. doi: 10.1186/s12913-021-06883-6. PMID: 34425809; PMCID: PMC8381504.	Qualitative - exploratory design Semi-structured frontline HCW interviews; observations and literature review	The findings revealed three main themes and six sub-themes. Main themes were Prioritisation of TB/HIV co-infection while negating TB-DM comorbidity, Poor working conditions, and Coping mechanisms, whereas sub-themes were Low knowledge and awareness of TB-DM comorbidity, Limited awareness of the collaborative framework, High workload in TB & DM Clinics, Multiple roles, Inadequate training, and Spa…	Included for analysis
2	PLOS ONE PAGE	2022-05-20	Salifu RS, Hlongwana KW (2020) Barriers and facilitators to bidirectional screening of TB-DM in Ghana: Healthcare workers’ perspectives. PLoS ONE 15(7): e0235914. https://doi.org/10.1371/journal.pone.0235914	exploratory qualitative study	Six themes emerged from the analysis, of which two (Increase in staff capacity, and Institutionalisation of bidirectional screening) were facilitators, and four (Delays in screening, Fear and stigmatization of TB, Poor collaboration between TB and DM units, and Skewed funding for screening) were barriers.	Included for analysis
3	PubMed	2022-05-20	Ekeke N, Ukwaja KN, Chukwu JN, Nwafor CC, Meka AO, Egbagbe EE, Soyinka FO, Alobu I, Agujiobi I, Akingbesote S, Igbinigie O, Offor JB, Madichie NO, Alphonsus C, Anyim MC, Mbah OK, Oshi DC. Screening for diabetes mellitus among tuberculosis patients in Southern Nigeria: a multi-centre implementation study under programme settings. Sci Rep. 2017 Mar 10;7:44205. doi: 10.1038/srep44205. PMID: 28281682…	Implementation study	The burden of DM among TB patients is high. Prioritization of DM screening for TB patients is indicated.	Included for analysis
4	BMC Public Health Page	2022-05-20	Shayo, F.K., Shayo, S.C. Availability and readiness of diabetes health facilities to manage tuberculosis in Tanzania: a path towards integrating tuberculosis-diabetes services in a high burden setting?. BMC Public Health 19, 1104 (2019). https://doi.org/10.1186/s12889-019-7441-6	secondary analysis of the 2014–2015 Tanzania Service Provision Assessment Survey data	There were 619 DM facilities all over the country of which only 238 (38.4%) had TB services.72.6 and 62.6% of these DM facilities with TB services were publicly owned and located in rural settings respectively. Generally, DM facilities had low readiness to manage TB; 12·6%. More specifically, all DM facilities had low readiness in terms of trained staff and guidelines. However, in the domain of d…	Included for analysis
5	Web of Science	2022-05-20	Workneh, M.H., Bjune, G.A. & Yimer, S.A. Assessment of health system challenges and opportunities for possible integration of diabetes mellitus and tuberculosis services in South-Eastern Amhara Region, Ethiopia: a qualitative study. BMC Health Serv Res 16, 135 (2016). https://doi.org/10.1186/s12913-016-1378-6	descriptive qualitative study	A total of 44 (12 in-depth interviews and 32 focus group discussion) participants were included in the study. The study participants identified a number of health system challenges and opportunities affecting the integration of TB-DM services. The main themes identified were: 1. Unavailability of system for continuity of DM care. 2. Inadequate knowledge and skills of health workers. 3. Frequent s…	Included for analysis
6	PubMed	2022-05-23	Achanta S, Tekumalla RR, Jaju J, et al. Screening tuberculosis patients for diabetes in a tribal area in South India. Public Health Action. 2013;3(Suppl 1):S43-S47. doi:10.5588/pha.13.0033	cross-sectional study	Screening of TB patients for DM was feasible and effective, and this should inform national scale-up. Other key considerations include the continued provision of free TB-DM screening, with co-location and integration of services.	Included for analysis
7	PubMed	2022-05-23	Viney K, Cavanaugh J, Kienene T, Harley D, Kelly PM, Sleigh A, O'Connor J, Mase S. Tuberculosis and diabetes mellitus in the Republic of Kiribati: a case-control study. Trop Med Int Health. 2015 May;20(5):650-657. doi: 10.1111/tmi.12462. Epub 2015 Feb 26. PMID: 25598275.	case–control study	Results: A total of 275 TB cases and 499 controls were enrolled. The diabetes prevalence in cases (101, 37%) was significantly greater than in controls (94, 19%) (adjusted odds ratio: 2.8; 95% CI 2.0-4.1). Fifty-five percent (108) of all diabetic diagnoses were new; this proportion was higher among controls (64.8%) than cases (46.5%). Five patients with TB were screened to detect one patient with…	Included for analysis
8	PubMed	2022-05-23	Workneh MH, Bjune GA, Yimer SA. Assessment of health system challenges and opportunities for possible integration of diabetes mellitus and tuberculosis services in South-Eastern Amhara Region, Ethiopia: a qualitative study. BMC Health Serv Res. 2016 Apr 19;16:135. doi: 10.1186/s12913-016-1378-6. PMID: 27095028; PMCID: PMC4837556.	descriptive qualitative study	Result: A total of 44 (12 in-depth interviews and 32 focus group discussion) participants were included in the study. The study participants identified a number of health system challenges and opportunities affecting the integration of TB-DM services. The main themes identified were: 1. Unavailability of system for continuity of DM care. 2. Inadequate knowledge and skills of health workers. 3. Fr…	Included for analysis
9	PubMed	2022-05-23	Asante-Poku A, Asare P, Baddoo NA, Forson A, Klevor P, Otchere ID, Aboagye SY, Osei-Wusu S, Danso EK, Koram K, Gagneux S, Yeboah-Manu D. TB-diabetes co-morbidity in Ghana: The importance of Mycobacterium africanum infection. PLoS One. 2019 Feb 7;14(2):e0211822. doi: 10.1371/journal.pone.0211822. PMID: 30730937; PMCID: PMC6366779.	observational cross-sectional study	Results The prevalence of DM at time of diagnosis among 2990 enrolled TB cases was 9.4% (282/ 2990). TBDM cases were significantly associated with weight loss, poor appetite, night sweat and fatigue (p<0.001) and were more likely (p<0.001) to have lower lung cavitation 85.8% (242/282) compared to TB Non-Diabetic (TBNDM) patients 3.3% (90/2708). We observed 22.3% (63/282) treatment failures among …	Included for analysis
10	PubMed	2022-05-23	Dave P, Shah A, Chauhan M, Kumar AM, Harries AD, Malhotra S, Pujara K, Patel P, Mane M, Thakkar A, Bharaswadkar S, Sharath BN, Achanta S. Screening patients with tuberculosis for diabetes mellitus in Gujarat, India. Public Health Action. 2013 Nov 4;3(Suppl 1):S29-33. doi: 10.5588/pha.13.0027. PMID: 26393065; PMCID: PMC4463142.	Descriptive study	Results: Of 556 TB patients, 553 (99%) were assessed: 36 (6.5%) had diabetes (14 had been previously diagnosed DM and 22 were newly diagnosed), and 39 (7%) had IFG. The median (interquartile range) time to DM diagnosis was 5 (1-17) days. Age ≥35 years was associated with DM. The NNS was 25 and 14 for one new case of DM and IFG, respectively, with a lower NNS in males, those aged ≥35 years, those …	Included for analysis
11	PubMed	2022-05-25	Prakash BC, Ravish KS, Prabhakar B, et al. Tuberculosis-diabetes mellitus bidirectional screening at a tertiary care centre, South India. Public Health Action. 2013;3(Suppl 1):S18-S22. doi:10.5588/pha.13.0032	Descriptive study	Results: Of 510 TB patients, 32 (6.3%) had been previously diagnosed with DM. Screening among the remaining 478 patients yielded 15 (2.9%) with pre-diabetes and 15 (2.9%) newly diagnosed cases of DM. A higher prevalence of DM was found among patients aged ≥40 years, patients with pulmonary TB and smokers. Of the 47 TB-DM patients, 45 were enrolled in DM care. Of 1670 DM patients followed up in DM…	Included for analysis
12	PubMed	2022-05-25	Mtwangambate G, Kalluvya SE, Kidenya BR, Kabangila R, Downs JA, Smart LR, Fitzgerald DW, Peck RN. 'Cough-triggered' tuberculosis screening among adults with diabetes in Tanzania. Diabet Med. 2014 May;31(5):600-5. doi: 10.1111/dme.12348. Epub 2013 Nov 18. PMID: 24152037; PMCID: PMC4049009.	prospective cohort study	Results: Between September 2011 and March 2012, 700 adults with diabetes attended our hospital. A total of 693 were enrolled, 121/693 (17.5%) had cough and 32/693 (4.6%) had at least two of the classic symptoms of tuberculosis. Of note, 87/121 (71.9%) of patients with cough could not produce sputum spontaneously. Nine patients were diagnosed with tuberculosis for a prevalence of 1299/100 000 (1.3…	Included for analysis
13	PubMed	2022-05-25	Ncube RT, Dube SA, Machekera SM, Timire C, Zishiri C, Charambira K, Mapuranga T, Duri C, Sandy C, Dlodlo RA, Lin Y. Feasibility and yield of screening for diabetes mellitus among tuberculosis patients in Harare, Zimbabwe. Public Health Action. 2019 Jun 21;9(2):72-77. doi: 10.5588/pha.18.0105. PMID: 31417857; PMCID: PMC6645450.	descriptive study	Results: Of the 1617 TB patients registered at 10 pilot facilities, close to two thirds (60%) were male and 798 (49%) were bacteriologically confirmed. The median age was 37 years; two thirds (67%) were co-infected with HIV. A total of 1305 (89%) were screened for DM, and 111 (8.5%, 95% CI 7.0–10.2) were newly diagnosed with DM. Low TB notifying sites were more likely than high TB notifying sites…	Included for analysis
14	PubMed	2022-05-25	Fwoloshi S, Hachaambwa LM, Chiyeñu KO, Chirwa L, Hoffman TW, Ngalamika O, Bailey SL. Screening for Diabetes Mellitus among Tuberculosis Patients: Findings from a Study at a Tertiary Hospital in Lusaka, Zambia. Can J Infect Dis Med Microbiol. 2018 Mar 6;2018:3524926. doi: 10.1155/2018/3524926. PMID: 29692873; PMCID: PMC5859901.	observational study	Results: A total of 127 individuals were enrolled in the study. Six patients (5%) were found to have diabetes. Of these, three had a prior diagnosis of diabetes and were on medication while three were newly diagnosed. Low education level was significantly associated with DM (p=0.001; 95% CI 0.001-0.148). Conclusion: The prevalence of DM among individuals with smear positive TB in our study popula…	Included for analysis
15	PubMed	2022-05-25	Arini M, Sugiyo D, Permana I. Challenges, opportunities, and potential roles of the private primary care providers in tuberculosis and diabetes mellitus collaborative care and control: a qualitative study. BMC Health Serv Res. 2022 Feb 17;22(1):215. doi: 10.1186/s12913-022-07612-3. PMID: 35177037; PMCID: PMC8851698.	descriptive qualitative research	Results: PPCs have not been initiated into the implementation of the collaborative TB-DM programme. The themes identified in this study were health system-related barriers, knowledge and perception of HCWs, lack of implementation of bi-directional screening, and needs of multisector role. The potential roles identified for PPCs include involvement in health promotion, bi-directional screening, pa…	Included for analysis
16	PubMed	2022-05-25	Ekeke N, Aniwada E, Chukwu J, Nwafor C, Meka A, Chukwuka A, Ezeakile O, Ajayi A, Soyinka F, Bakpa F, Uwanuruochi V, Aniekwensi E, Eze C. Screening diabetes mellitus patients for tuberculosis in Southern Nigeria: A pilot study. Adv Respir Med. 2020;88(1):6-12. doi: 10.5603/ARM.2020.0072. PMID: 32153002.	Across-sectional study	Results: 3 457 patients were screened with amean age (SD) of 59.9 (12.9) years. The majority were male, 2 277 (65.9%). Overall prevalence of TB was 0.8% (800 per 100 000). Sixteen (0.5%) were known TB cases (old cases). There were 221 presumptive cases (6.4%) out of which 184 (83.3%) were sent for Xpert MTB/Rif assay. Eleven (0.3%) new cases of TB were detected, giving additional yield of 40.7% a…	Included for analysis
17	PubMed	2022-05-25	Kyaw Soe T, Soe KT, Satyanarayana S, Saw S, San CC, Aung ST. Gaps in Implementing Bidirectional Screening for Tuberculosis and Diabetes Mellitus in Myanmar: An Operational Research Study. Trop Med Infect Dis. 2020 Feb 1;5(1):19. doi: 10.3390/tropicalmed5010019. PMID: 32024081; PMCID: PMC7157683.	cross sectional descriptive study i	Of the total 8198 DM patients attending hospitals, 302 (3.7%) patients were tested for sputum smear and 147 (1.7%) were diagnosed with TB. In conclusion, only half of the eligible TB patients were screened for DM and the yield of TB cases among screened DM patients was high. There is an urgent need for improving and scaling up bidirectional screening in the country.	Included for analysis
18	PubMed	2022-05-26	Salifu RS, Hlongwana KW. Barriers and facilitators to bidirectional screening of TB-DM in Ghana: Healthcare workers' perspectives. PLoS One. 2020 Jul 14;15(7):e0235914. doi: 10.1371/journal.pone.0235914. PMID: 32663233; PMCID: PMC7360027.	exploratory qualitative study	Results: Six themes emerged from the analysis, of which two (Increase in staff capacity, and Institutionalisation of bidirectional screening) were facilitators, and four (Delays in screening, Fear and stigmatization of TB, Poor collaboration between TB and DM units, and Skewed funding for screening) were barriers. Conclusions: The implementation of bidirectional screening at public health facilit…	Excluded
19	PubMed	2022-05-26	Hewage S, Somasundaram N, Ratnasamy V, Ranathunga I, Fernando A, Perera I, Perera U, Vidanagama D, Cader M, Fernando P, Pallewatte N, Rathnayaka L, Jayawardhana D, Danansuriya M, Gunawardena N. Active screening of patients with diabetes mellitus for pulmonary tuberculosis in a tertiary care hospital in Sri Lanka. PLoS One. 2021 Apr 8;16(4):e0249787. doi: 10.1371/journal.pone.0249787. PMID: 338310…	cross-sectional study	Analysis revealed PTB detection rates among males aged �60 years with HbA1c � 8 to be 0�4% (n = 2, 95%CI = 0�0–1�4%). The study concludes that active screening for PTB among all DM patients at clinic settings in Sri Lanka, to be non-effective measure to enhance TB case finding. However, the sub-category of diabetic males with uncontrolled diabetics who are over 60 years of age is recommended as a…	Included for analysis
20	PubMed	2022-05-26	Trinidad RM, Brostrom R, Morello MI, Montgomery D, Thein CC, Gajitos ML, Heetderks A, Chorba T. Tuberculosis screening at a diabetes clinic in the Republic of the Marshall Islands. J Clin Tuberc Other Mycobact Dis. 2016 Oct 22;5:4-7. doi: 10.1016/j.jctube.2016.10.001. PMID: 31723690; PMCID: PMC6850250.	prospective cohort study	Results: Screening for TB led to the diagnosis of 77 patients with TB infection and 11 patients with TB disease. From these data, the prevalence of TB disease among DM patients in the clinic exceeded 5% (95% CI 2.2%-8.1%). All patients who completed TB screening were at high risk of TB disease, and those with DM aged ≤ 50 years had a higher risk of TB disease than those with DM over age 50 (RR 3.…	Included for analysis
21	PubMed	2022-05-27	Sarker M, Barua M, Guerra F, Saha A, Aftab A, Latif AH, Islam S, Islam A. Double Trouble: Prevalence and Factors Associated with Tuberculosis and Diabetes Comorbidity in Bangladesh. PLoS One. 2016 Oct 31;11(10):e0165396. doi: 10.1371/journal.pone.0165396. PMID: 27798659; PMCID: PMC5087880.	community based cross-sectional quantitative study	Result Among the 1910 TB patients who participated in screening for diabetes, 245 (12.8%) were found to have diabetes and 296 (15.5%) to have pre-diabetes. Out of those who had diabe- tes, 34.7% were newly diagnosed through the current study and 65.3% already knew their status. Among those who were found to have prediabetes, 27 (9.1%) had impaired Fasting Blood Glucose (FBG), 230 (77.7%) had Impa…	Included for analysis
22	Web of Science	2022-05-27	Basir MS, Habib SS, Zaidi SMA, et al. Operationalization of bi-directional screening for tuberculosis and diabetes in private sector healthcare clinics in Karachi, Pakistan. BMC Health Serv Res. 2019;19(1):147. Published 2019 Mar 6. doi:10.1186/s12913-019-3975-7	cross-sectional study	Results A total of 450,385 individuals were screened, of whom 18,109 had presumptive DM and 90,137 had presumptive TB. 14,550 of these individuals were presumptive for both DM and TB. The uptake of DM testing among those with presumptive diabetes was 26.1% while the uptake of TB testing among presumptive TB cases was 5.9%. Despite efforts to promote bi-directional screening of TB and DM, the upta…	Included for analysis
23	Web of Science	2022-05-27	Paul KK, Alkabab YMA, Rahman MM, et al. A public-private model to scale up diabetes mellitus screening among people accessing tuberculosis diagnostics in Dhaka, Bangladesh. Int J Infect Dis. 2020;92:56-61. doi:10.1016/j.ijid.2020.01.001		Results: Among 7647 people evaluated for both TB and DM, the NNS was 35 (95% confidence interval (CI) 31–40) to diagnose one new case of DM; among those diagnosed with TB, the NNS was 21 (95% CI 17–29). Among those with diagnosed TB, patients with DM were more likely to have cavitation on chest X-ray compared to those without DM (31% vs 22%). Treatment failure (odds ratio (OR) 18.9, 95% CI 5.43–6…	Included for analysis
24	Web of Science	2022-05-27	Nyirenda JLZ, Wagner D, Ngwira B, Lange B. Bidirectional screening and treatment outcomes of diabetes mellitus (DM) and Tuberculosis (TB) patients in hospitals with measures to integrate care of DM and TB and those without integration measures in Malawi. BMC Infect Dis. 2022;22(1):28. Published 2022 Jan 4. doi:10.1186/s12879-021-07017-3	Retrospective chart review analysis	Results 557 PWDs (mean age 54) and 987 TB patients (mean age 41) were recruited. 64/557 (11.5%) PWDs and 105/987 (10.6%) of TB patients were from an integrating hospital. 36/64 (56.3%) PWDs were screened for TB in integrated healthcare as compared to 5/493 (1.0%) in non-integrated care; Risk Difference (RD) 55.2%, (95%CI 43.0, 67.4), P < 0.001, while 10/105 (9.5%) TB patients were screened for DM…	Included for analysis
